# Supplementary material for: Variation in Lipid Species Profiles among Leukemic Cells Significantly Impacts Their Sensitivity to the Drug Targeting of Lipid Metabolism and the Prognosis of AML Patients
Source: MDPI journal article supplement (doi:10.3390/ijms24065988), 2023-03-22
Supplement: s1 [file s1]

**Supplemental Table S1. Patient's characteristics at diagnosis of *de novo* AML (n = 39)**

|                                         |              |
|-----------------------------------------|--------------|
| <b>Median age</b>                       | 58 [24 ; 88] |
| <b>Sex ratio (M/W)</b>                  | 2            |
| <b>Leukocytosis</b>                     | <b>n (%)</b> |
| < 4 10 <sup>3</sup> /μL                 | 8 (20)       |
| 4-30 10 <sup>3</sup> /μL                | 17 (44)      |
| 30-100 10 <sup>3</sup> /μL              | 11 (28)      |
| > 100 10 <sup>3</sup> /μL               | 3 (8)        |
| <b>AML subtype (FAB classification)</b> | <b>n (%)</b> |
| M0                                      | 2 (5)        |
| M1                                      | 9 (23)       |
| M2                                      | 18 (46)      |
| M4                                      | 6 (16)       |
| M5                                      | 4 (10)       |
| <b>Bone marrow blasts</b>               | <b>n (%)</b> |
| 20-40%                                  | 9 (23)       |
| 40-60%                                  | 11 (28)      |
| 60-80%                                  | 9 (23)       |
| 80-100%                                 | 10 (26)      |
| <b>Prognosis (ELN 2017)</b>             | <b>n (%)</b> |
| Favorable                               | 21 (54)      |
| Adverse                                 | 18 (46)      |
| <b>Molecular status</b>                 | <b>n (%)</b> |
| <i>NPM1</i>                             | 15 (38)      |
| <i>FLT3-ITD</i>                         | 11 (28)      |
| <i>IDH</i>                              | 9 (23)       |
| <i>TET2</i>                             | 4 (10)       |
| <i>CEBPA</i>                            | 4 (10)       |
| <i>RUNX1</i>                            | 1 (3)        |
| <i>TP53</i>                             | 1 (3)        |
| <b>Response to chemotherapy</b>         | <b>n (%)</b> |
| Chemosensitive                          | 20 (51)      |
| Chemoresistant                          | 6 (16)       |
| Non available                           | 13 (33)      |
